# Supplementary material for: The Lipocalin2 Gene is Regulated in Mammary Epithelial Cells by NFκB and C/EBP In Response to Mycoplasma
Source: PubMed Central journal article supplement (PMC7203223; doi:10.1038/s41598-020-63393-x), 2020-05-06
Supplement: 41598_2020_63393_MOESM1_ESM.pdf [file 41598_2020_63393_MOESM1_ESM.pdf]

The Lipocalin2 Gene is Regulated in Mammary Epithelial Cells by NFκB and C/EBP In  
Response to Mycoplasma

Wei Zhao,<sup>1,2,3</sup> Lee Bendickson<sup>1</sup> and Marit Nilsen-Hamilton<sup>1,2</sup>

Supplementary Material

Table S1: Oligonucleotides used for supplemental materials

| C/EBP isoform    | Amplicon size (nt) | primers                                       |
|------------------|--------------------|-----------------------------------------------|
| C/EBP $\alpha$   | 329                | TTCGGGTCGCTGGATCTCTA,<br>CCCGAGAGGAAGCAGGAATC |
| C/EBP $\beta$    | 130                | GGTTTCGGGACTTGATGCA<br>CAACAACCCCGCAGGAAC     |
| C/EBP $\gamma$   | 399                | GCAAAGGAACGTGCCCAAAT<br>GTGCGCATGCTCAAGAAACA  |
| C/EBP $\delta$   | 189                | GAACCCGCGGCCTTCTAC<br>GAAGAGTTCGTCGTGGCACA    |
| C/EBP $\epsilon$ | 243                | AGTCGAGGCAGCTACAATCC<br>GTTACGTTACGTCGCAGTC   |

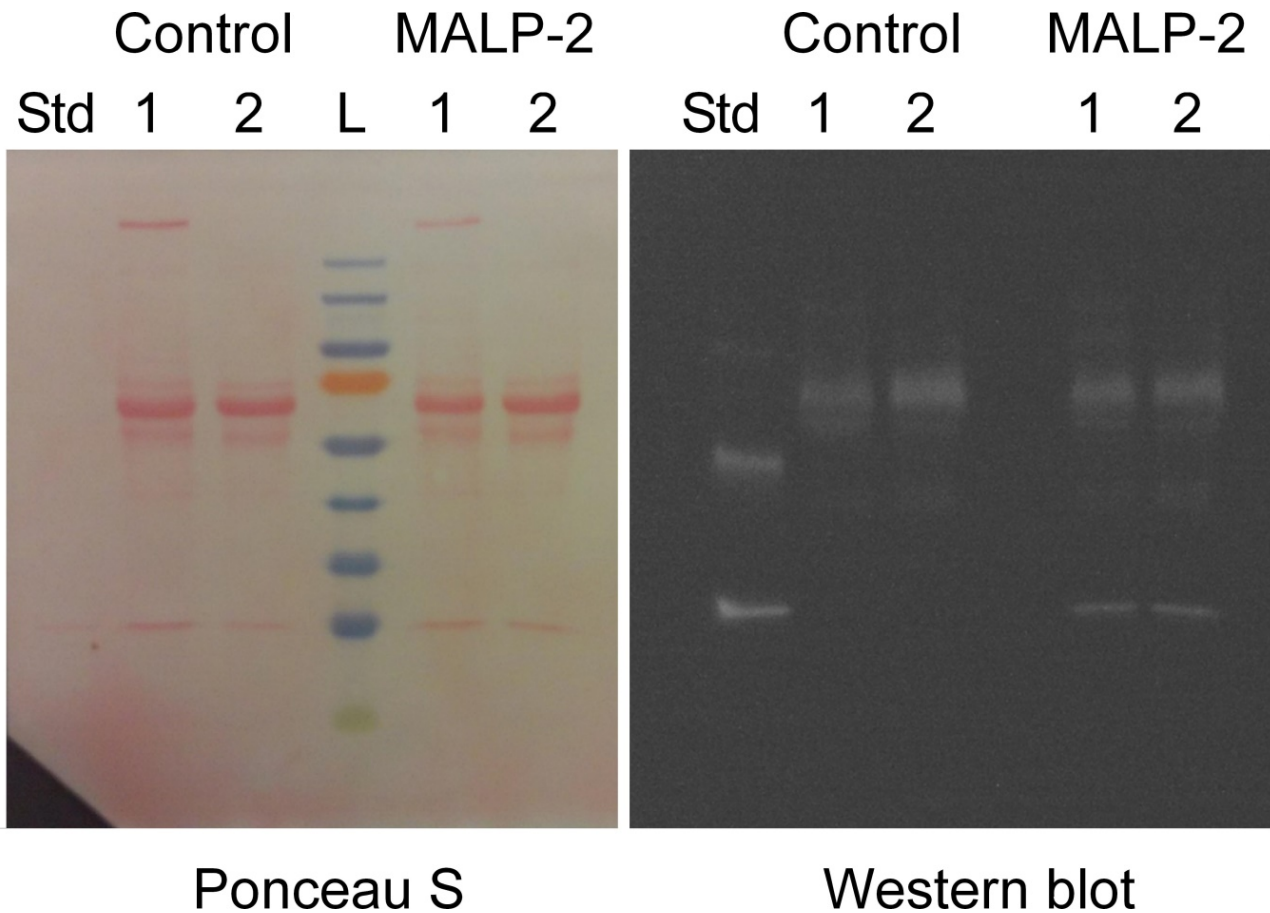

**Figure S1:** Effect of MALP-2 on secreted levels of Lcn2

**Legend:** HC11 cells were grown in RPMI-1640, 5% FCS26, 100U/ml P/S, 5ug/ml insulin until 50% confluent then switched to the same medium with 0.1% FCS for 24 h after which they were incubated with or without 10 ng/mL MALP-2 for 24 h. The medium was collected, concentrated and resolved on a 15% SDS acrylamide under reducing conditions. The gel blotted to a nitrocellulose membrane and the membrane immunostained for Lcn2 using primary polyclonal antibody produced against purified murine Lcn2 (1:500) and goat anti-rabbit IgG-HRP from Pierce (catalog#31462) at 1:5,000. The immunostain was developed using chemiluminescent substrates (Pierce catalog#32209). A standard of purified Lcn2 (Std) was run in the first lane of the gel. **Left panel:** Ponceau S stain of the membrane after transfer showing remaining protein and the ladder (L), PageRuler™ from Thermo Scientific (catalog# 6616). **Right panel:** Immunostained gel. The results of two independent experiments (1 and 2) are shown.

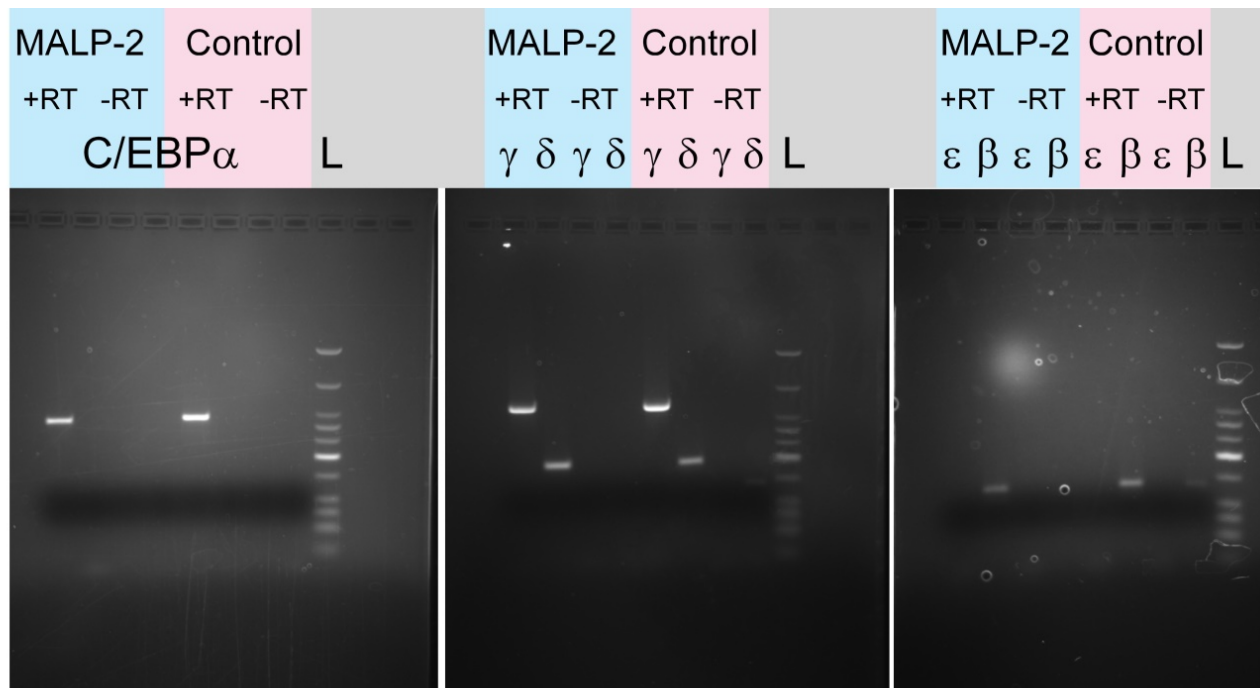

**Figure S2:** C/EBP isoforms expressed by HC11 cells

**Legend:** HC11 cells were grown in RPMI-1640, 5% FCS, 100U/ml P/S, 5ug/ml insulin until 50% confluent then switched to the same medium with 0.1% FCS for 24 h after which they were incubated with or without 10 ng/mL MALP-2 for 24 h. The cells were collected, the RNA extracted with Trizol reagent (Sigma-Aldrich). The RNA was incubated for 15 min at 23°C with 1 U/ $\mu$ L Dnase (Invitrogen catalog#18068015) then reverse transcribed in the presence (+RT) or absence (-RT) of 10 U/ $\mu$ L SuperScript IV, Thermofisher (catalog# 18090010) for 23, 50 then 80°C for 10 min at each temperature. The resulting cDNAs were quantified in 50% iQ SYBR Green supermix (BioRad catalog#170-8880) using primers in table S1 to amplify C/EBP $\alpha$ ,  $\beta$ ,  $\gamma$ ,  $\delta$ , or  $\epsilon$ . The samples were evaluated by real-time PCR for estimates of Ct and then resolved by electrophoresis through 2% agarose in TAE buffer. A low molecular weight DNA ladder (New England Biolabs, catalog # N3233S) was run on each gel.

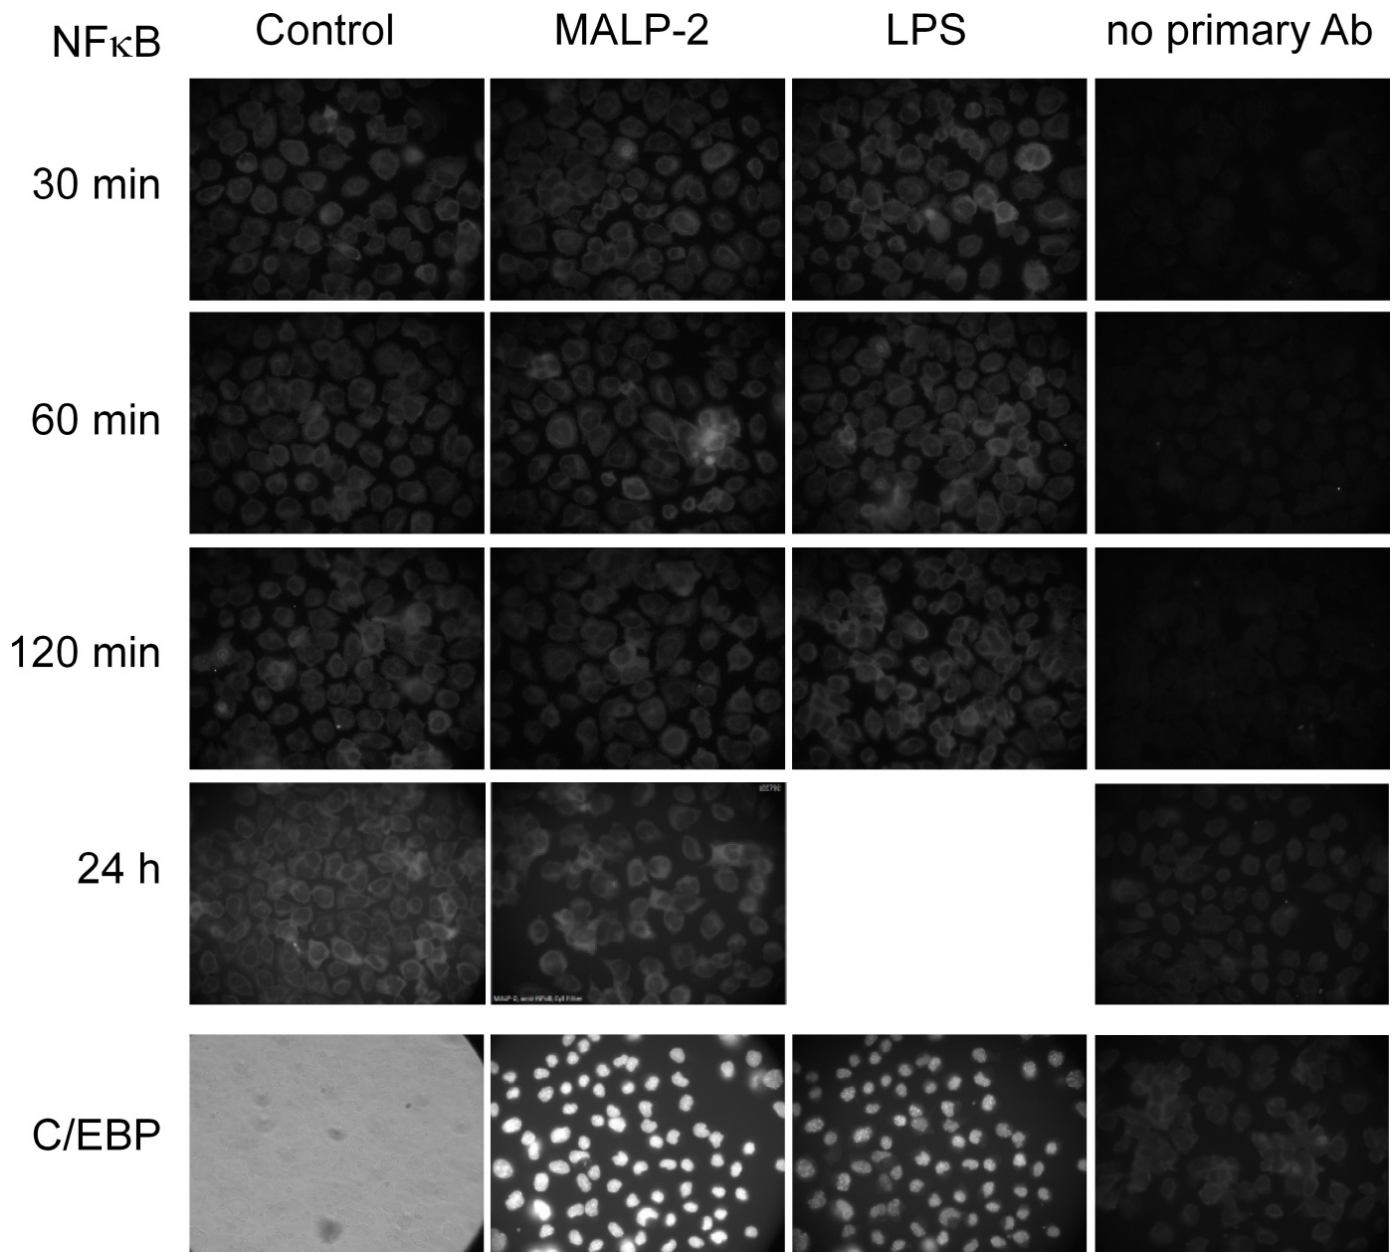

**Figure S3:** Effect of MALP-2 and LPS on NF $\kappa$ B distribution in HC11 cells

**Legend:** HC11 cells were grown in RPMI-1640, 5% FCS26, 100U/ml P/S, 5ug/ml insulin until 50% confluent then switched to the same medium with 0.1% FCS for 24 h after which they were incubated with or without 10 ng/mL MALP-2 or 10  $\mu$ g/mL LPS for 30, 60, or 120 min (experiment 1) or 24 h (experiment 2). The cells were then fixed and immunostained with anti-Nf $\kappa$ B p65 (F-6), Santa Cruz Biotechnology, Inc. #sc-8008x (primary antibody) and Cy3 AffiniPure Donkey Anti-Mouse IgG, Jackson ImmunoResearch Laboratories, #715-165-151, lot# 67310. (secondary antibody). The blocking solution was 154 mM NaCl, 3 mM Na<sub>2</sub>HPO<sub>4</sub>, 1 mM KH<sub>2</sub>PO<sub>4</sub>, pH 7.4), 0.4% BSA, 0.2% Triton X-100, 2% donkey serum.
